# Supplementary material
Source: HighWire-hosted journal article supplement (https://bmjopen.bmj.com/content/9/8/e028792)
Supplement: inline-supplementary-material-2 [file inline-supplementary-material-2.pdf]

## 1 **Guide for Conducting a Semi-Structured Interview with Dental Patients**

2 [The purpose of this interview is to capture the attitude, knowledge and behaviour of dental patients  
3 towards tobacco cessation in Ahmedabad and to understand possible health service interventions to  
4 improve quality of care from patients' perspective along with factors that may facilitate or hinder the  
5 same.]

### 6 **1. Introduction**

7 Greet the patient and thank him/her for giving the interview. Introduce yourself (interviewer) and the  
8 Government Dental College and Hospital.  
9 Provide the interviewee with the leaflet on the study design and briefly explain the study.  
10 Explain about confidentiality and use of the study outcomes.  
11 Introduce the consent form. Ask for consent to record the audio and take notes.

### 12 **2. Interview**

13 Start by asking some general questions that the interviewee would be comfortable to answer...

14 *So please tell me something about yourself...* Collect the basic demographic data of participant (name,  
15 gender, age, religion, caste, education, present occupation and marital status).

16 *Please tell me which language do you speak at home? Which languages can you read and understand?* (The  
17 interview can then be carried out in that language.)

18 *For how long have you been coming to this hospital/clinic for your oral care?* (In case of a long period) *What is*  
19 *the reason you come here for your treatment?*

20

1 **2.1 Experiences and Practice of Tobacco Use**

2 *What form of tobacco products do you use? (smoking or chewing form)*

3 *For how long have you been using it? Do you use it daily? If yes, on average how many times a day do you use these*  
4 *products?*

5 *At what age did you start using tobacco products? How did you start using it? (peer, family, tradition, fun)*

6 *Tell me something about the effects of tobacco on health? (Try to bring out their views on both the positive and*  
7 *negative effects on general and oral health.)*

8 *Do you see any effect of tobacco use on your health?*

9 *Have you ever thought of quitting? (If yes, inquire about what happened then. What were the barriers and*  
10 *facilitators for the same? If no, why so?)*

11 *What will be the effects of quitting on your health?*

12 **2.2 Patients' Perceived Quality of Care and Satisfaction**

13 *What did your OHP or their team ask about your habit when you visited them? During which visit 1st, 2nd...?*

14 *How will you feel if you get advice from the OHP against tobacco use? How often do you expect such advice?*

15 *Please share your experience of getting advice from an OHP about the ill effects of tobacco use and the need to quit?*

16 *What support do you expect from the OHP if you wish to quit? (Inquire if the patient has ever expressed a*  
17 *desire to quit to the OHP.)*

18 *What are your thoughts if the tobacco cessation service is made payable?*

1 *Did you see any poster/video on tobacco in a language that you could easily read? Where? How has this affected*

2 *you?*

3

4

5

6

7

8

9
